# Supplementary material for: Use of telehealth for facilitating the diagnostic assessment of Autism Spectrum Disorder (ASD): A scoping review
Source: PubMed Central journal article supplement (PMC7377392; doi:10.1371/journal.pone.0236415), 2020-07-23
Supplement: pone.0236415.s004.pdf [file pone.0236415.s004.pdf]

**S4 Table 4. Results of quality assessment tool (from CASP) for qualitative study.**

|                                                                                         |                                          |
|-----------------------------------------------------------------------------------------|------------------------------------------|
|                                                                                         | <b>Nazneen et al.,<br/>2015<br/>[28]</b> |
| 1. Was there a clear statement of the aims of the research?                             | Yes                                      |
| 2. Is a qualitative methodology appropriate?                                            | Yes                                      |
| 3. Was the research design appropriate to address the aims of the research?             | Can't tell                               |
| 4. Was the recruitment strategy appropriate to the aims of the research?                | No                                       |
| 5. Was the data collected in a way that addressed the research issue?                   | No                                       |
| 6. Has the relationship between researcher and participants been adequately considered? | No                                       |
| 7. Have ethical issues been taken into consideration?                                   | No                                       |
| 8. Was the data analysis sufficiently rigorous?                                         | No                                       |
| 9. Is there a clear statement of findings?                                              | Can't tell                               |
| <b>Quality score</b>                                                                    | <b>Poor</b>                              |

Available at: <https://casp-uk.net/casp-tools-checklists/>
